# Supplementary material
Source: Springer Nature journal article supplement (https://www.springermedizin.de/resource/supplementary/12984_2009_166_MOESM1_ESM.pdf/9605536)
Supplement: MOESM1 [file 9605536]

**Effect: location (with PMC damage v. without PMC damage) \* time (initial eval v. final eval.)**

**MP Score**

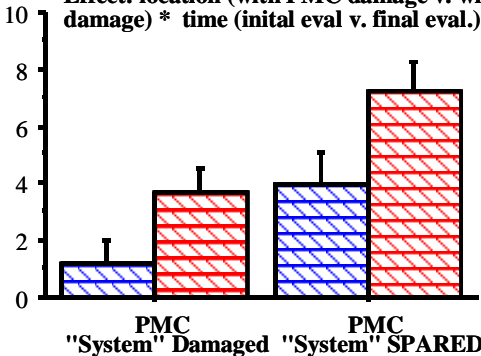

 **initial evaluation**  
 **final evaluation**

**Error Bars: ± 1 Standard Error(s)**
